# Supplementary material
Source: PubMed Central journal article supplement (PMC3075276)

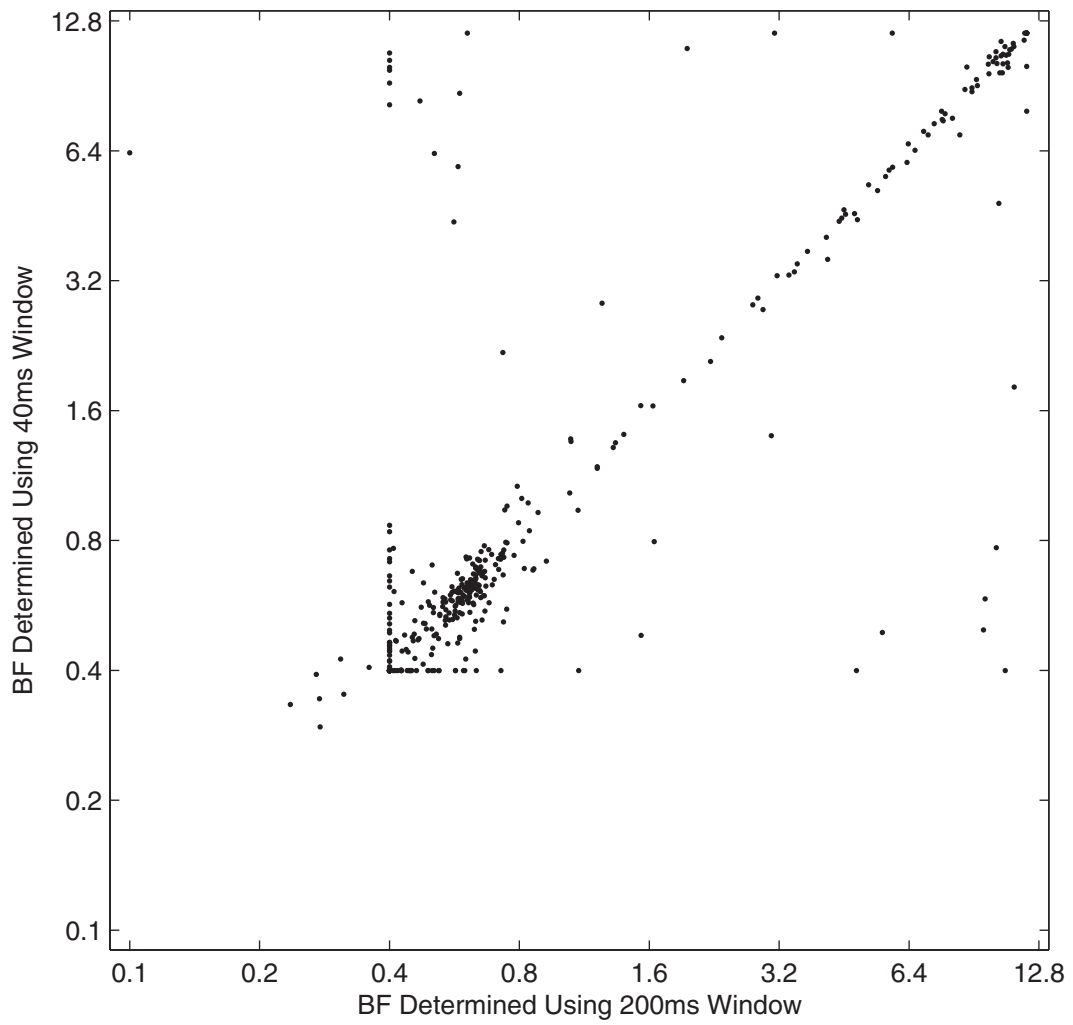

Supplement: supp_00857.2010_figS1.pdf [file supp_00857.2010_figS1.pdf]

# Monkey A

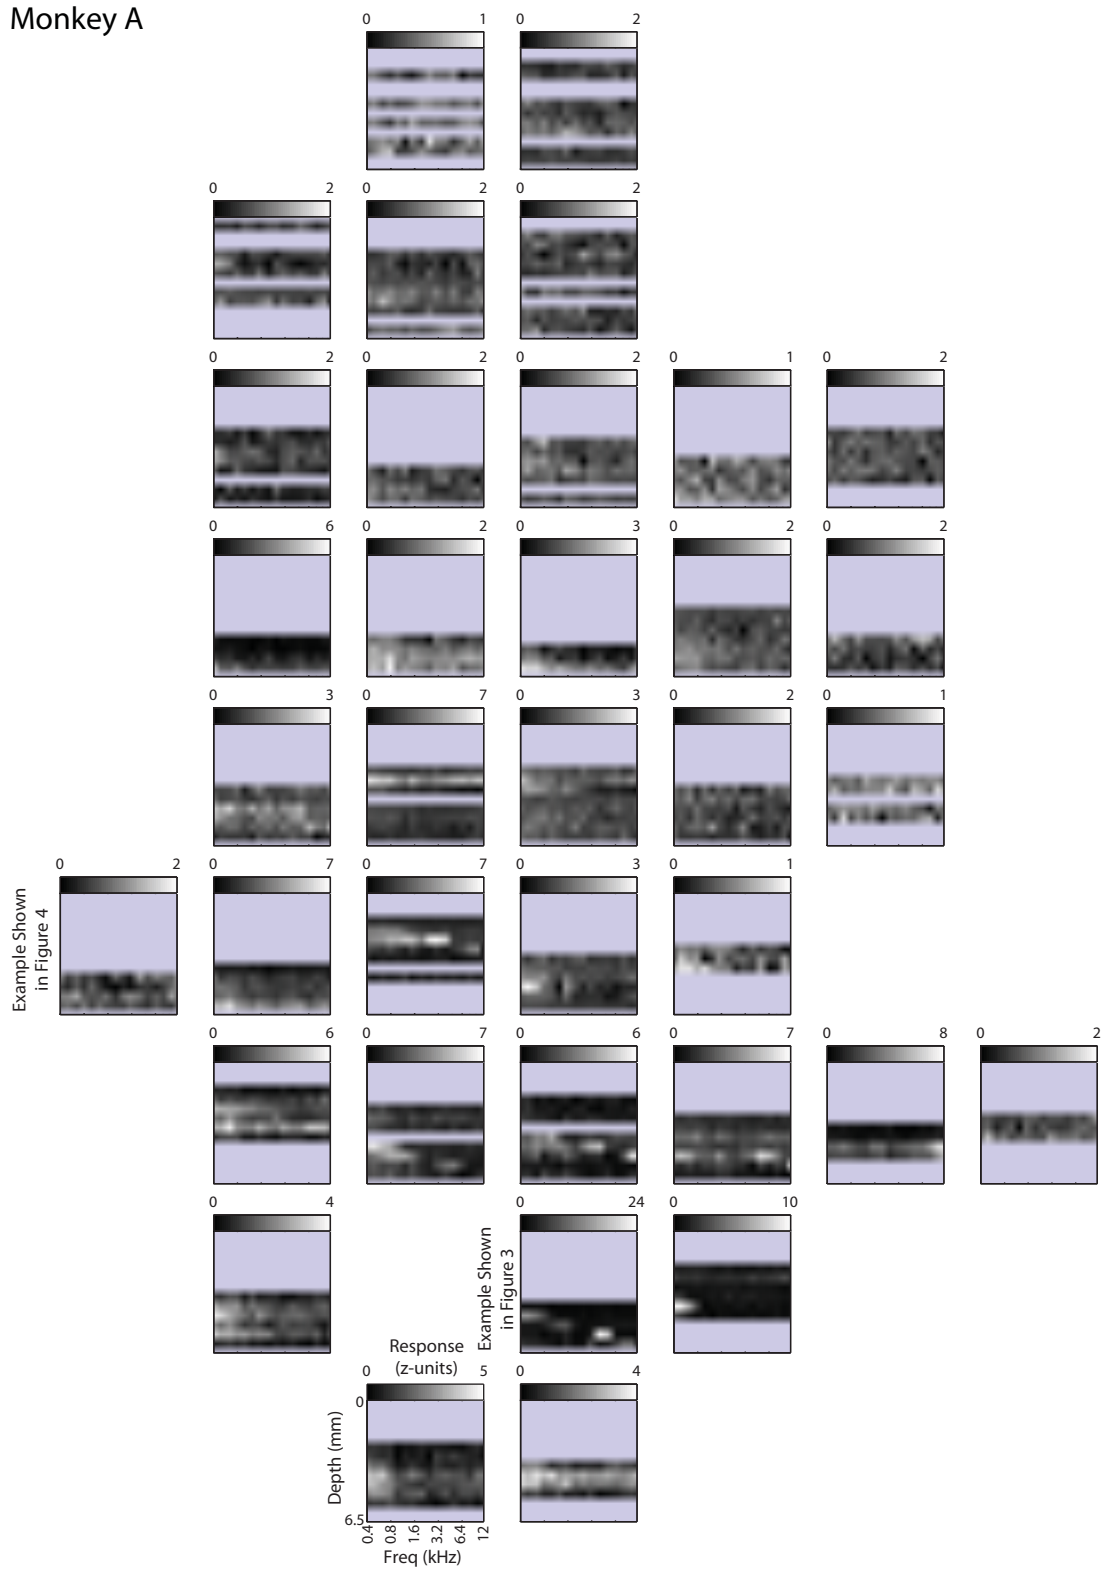

Supplement: supp_00857.2010_figS2.pdf [file supp_00857.2010_figS2.pdf]

# Monkey W

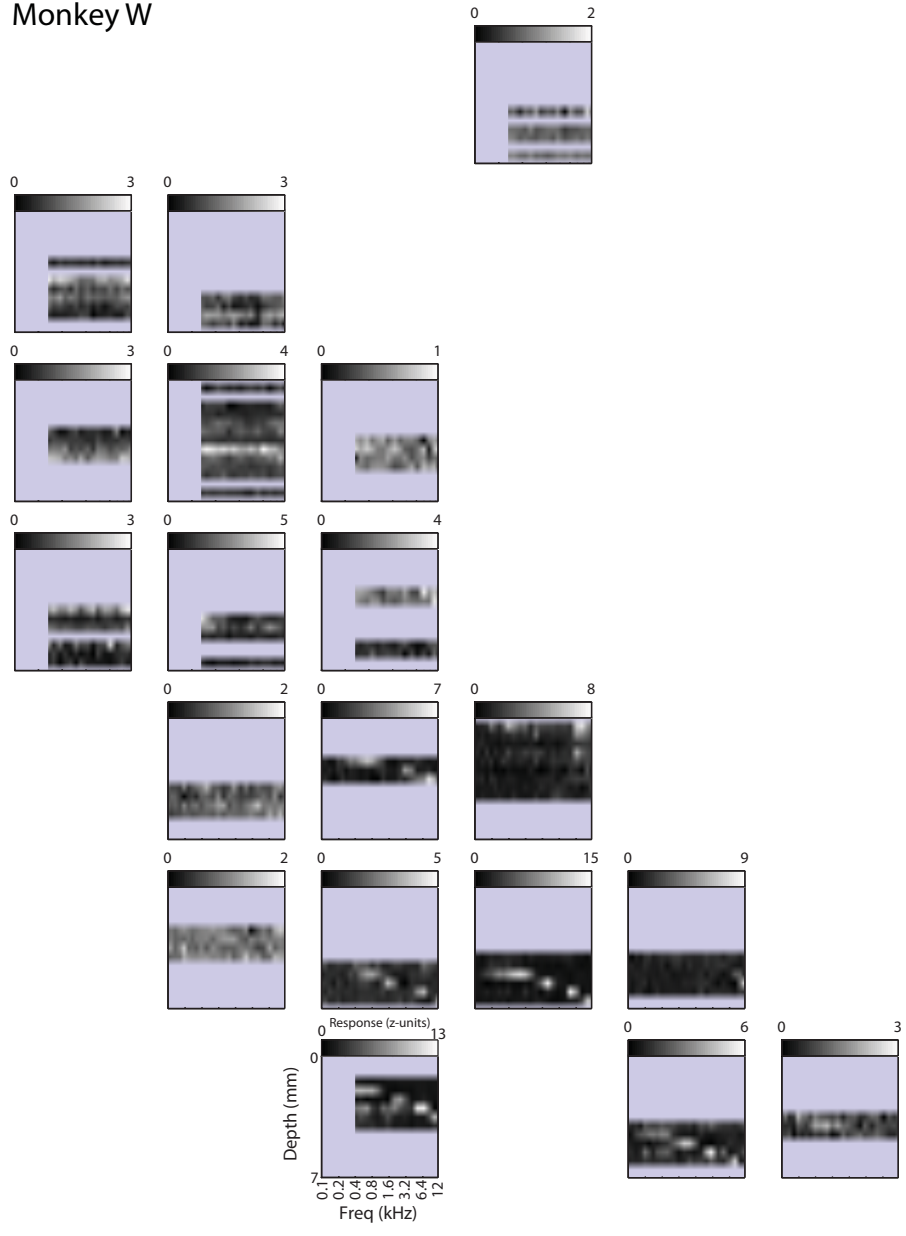

Supplement: supp_00857.2010_figS3.pdf [file supp_00857.2010_figS3.pdf]

# Monkey E

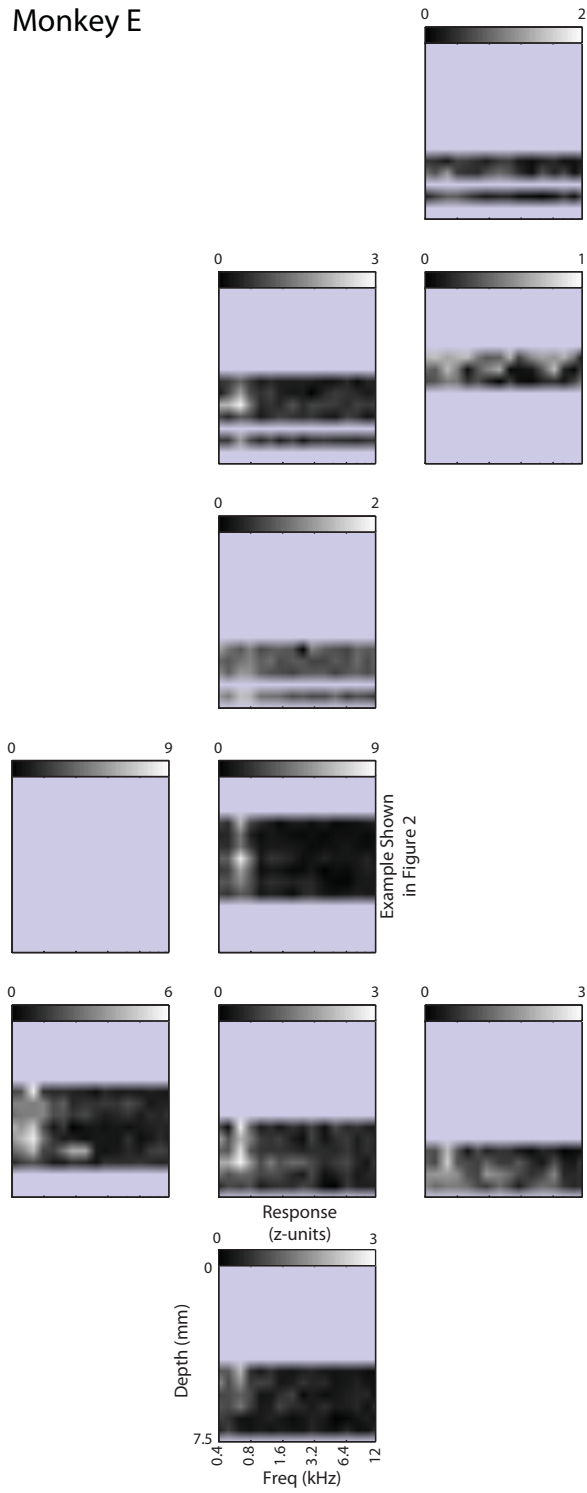

Supplement: supp_00857.2010_figS4.pdf [file supp_00857.2010_figS4.pdf]

# Monkey M

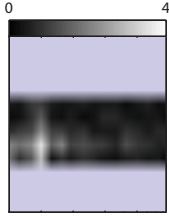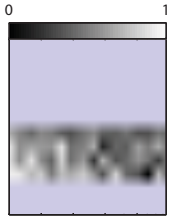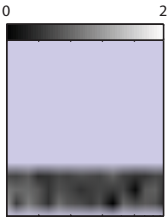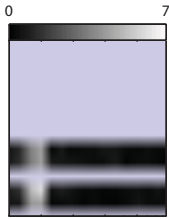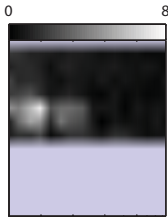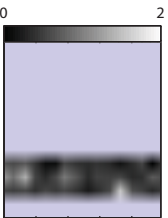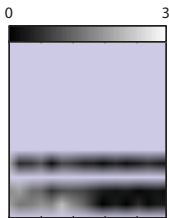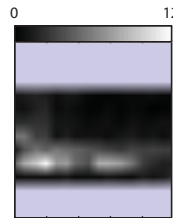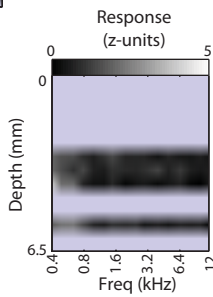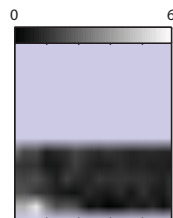

Supplement: supp_00857.2010_figS5.pdf [file supp_00857.2010_figS5.pdf]

# Monkey C

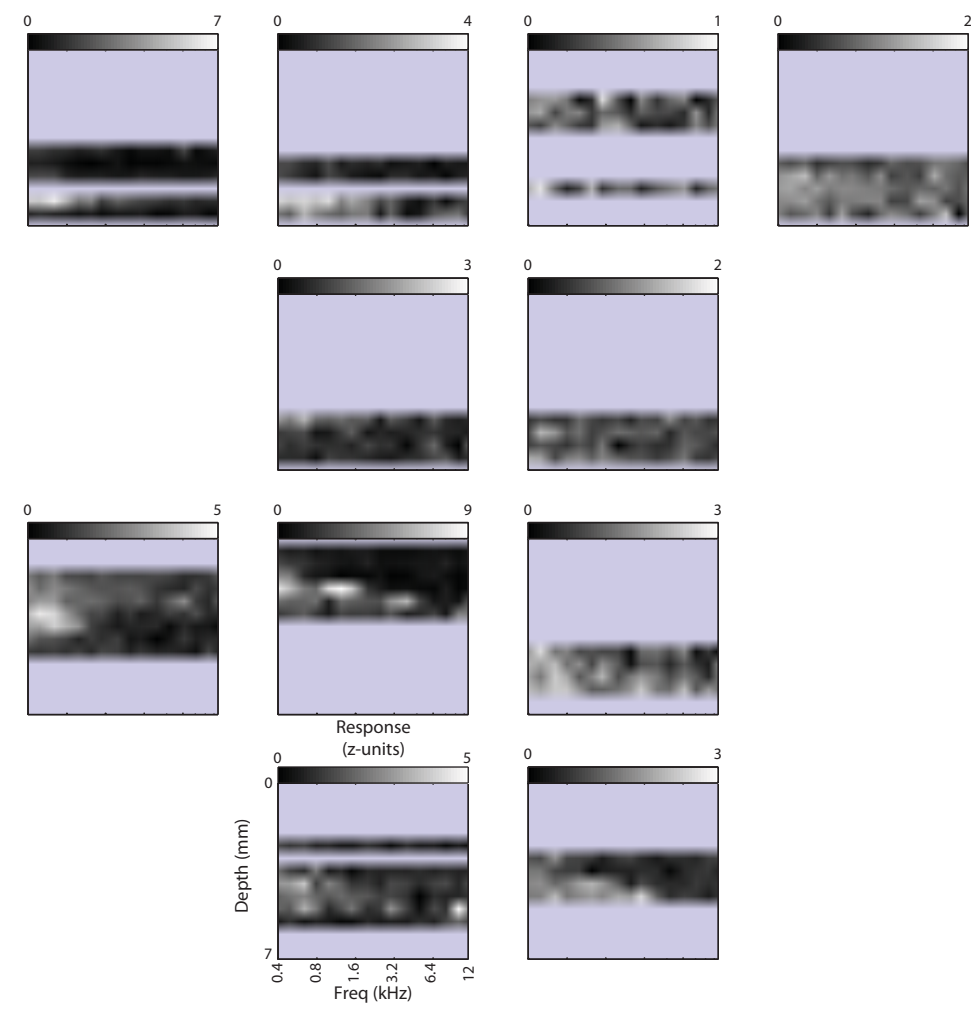

Supplement: supp_00857.2010_figS6.pdf [file supp_00857.2010_figS6.pdf]

# Monkey X

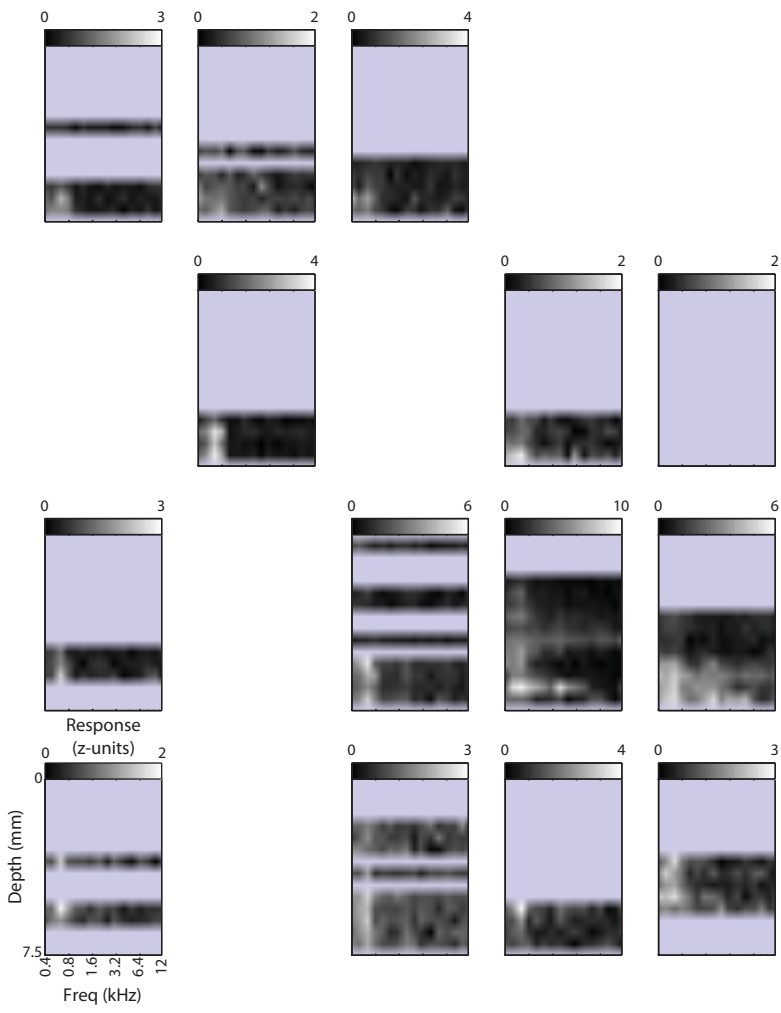

Supplement: supp_00857.2010_figS7.pdf [file supp_00857.2010_figS7.pdf]

Monkey A

Monkey W

Monkey E

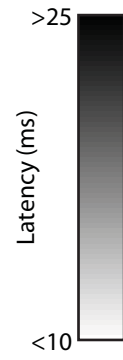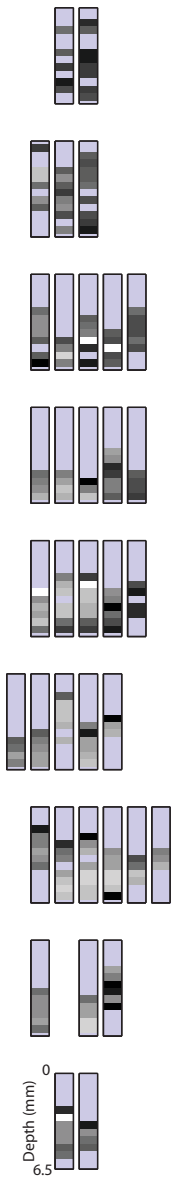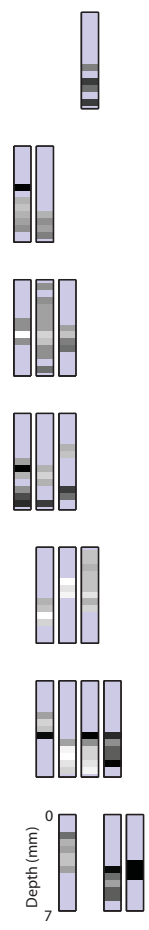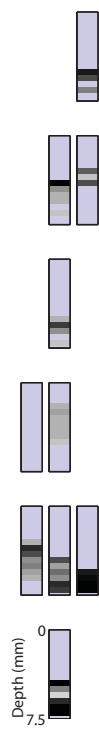

Monkey M

Monkey C

Monkey X

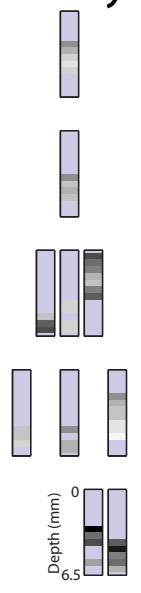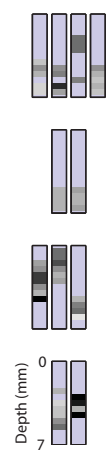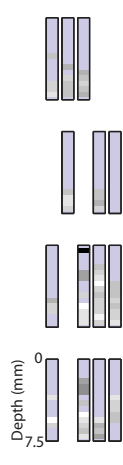

Supplement: supp_00857.2010_figS8.pdf [file supp_00857.2010_figS8.pdf]

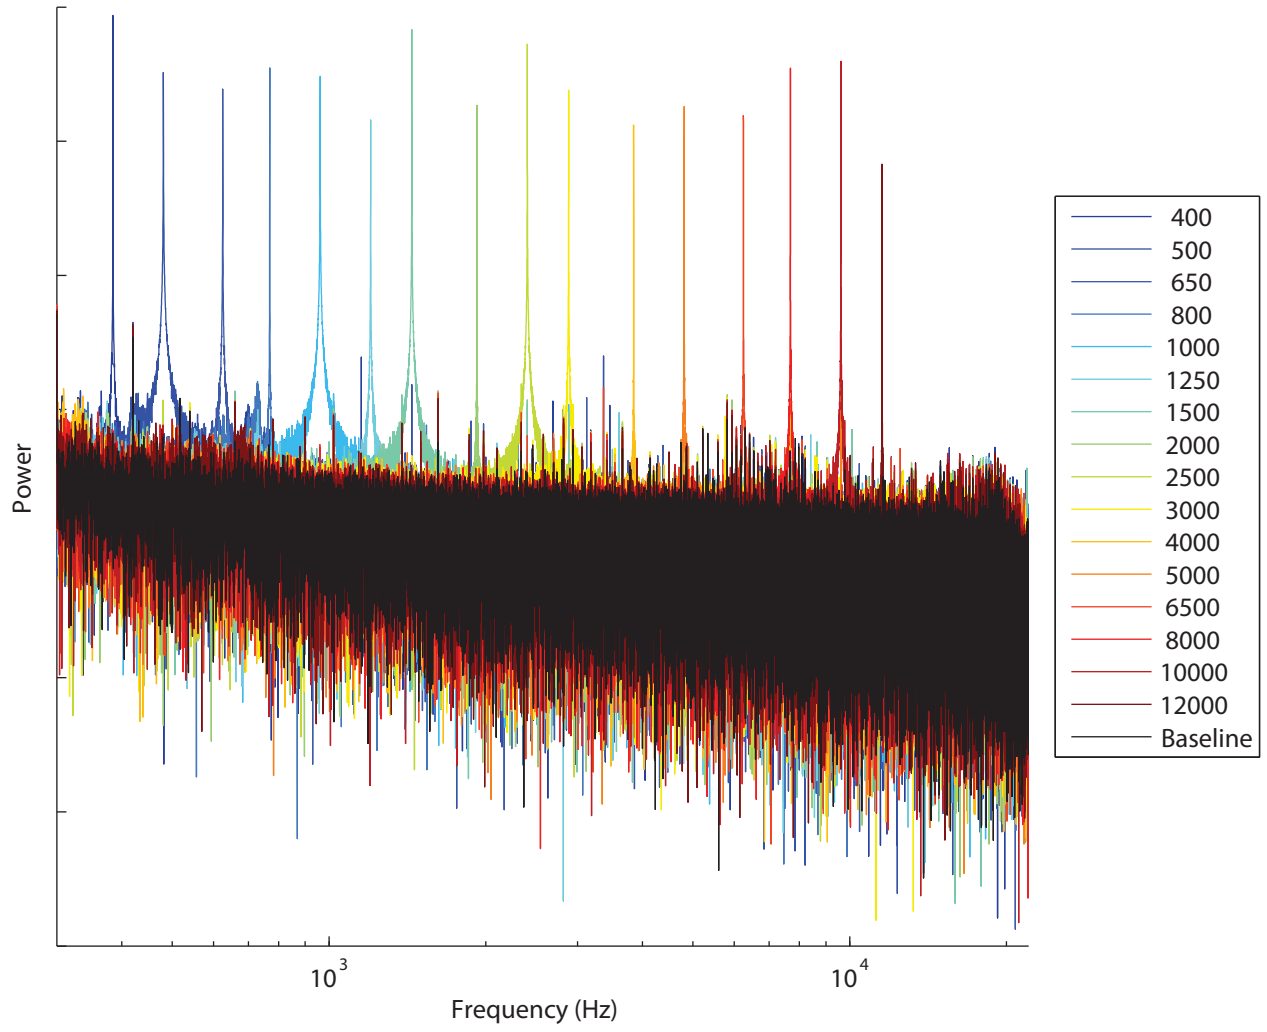

Supplement: supp_00857.2010_figS9.pdf [file supp_00857.2010_figS9.pdf]
